# Supplementary material for: Full Genome Sequencing of Three Sedoreoviridae Viruses Isolated from Culicoides spp. (Diptera, Ceratopogonidae) in China
Source: MDPI journal article supplement (doi:10.3390/v14050971), 2022-05-05
Supplement: s1 [file s1]

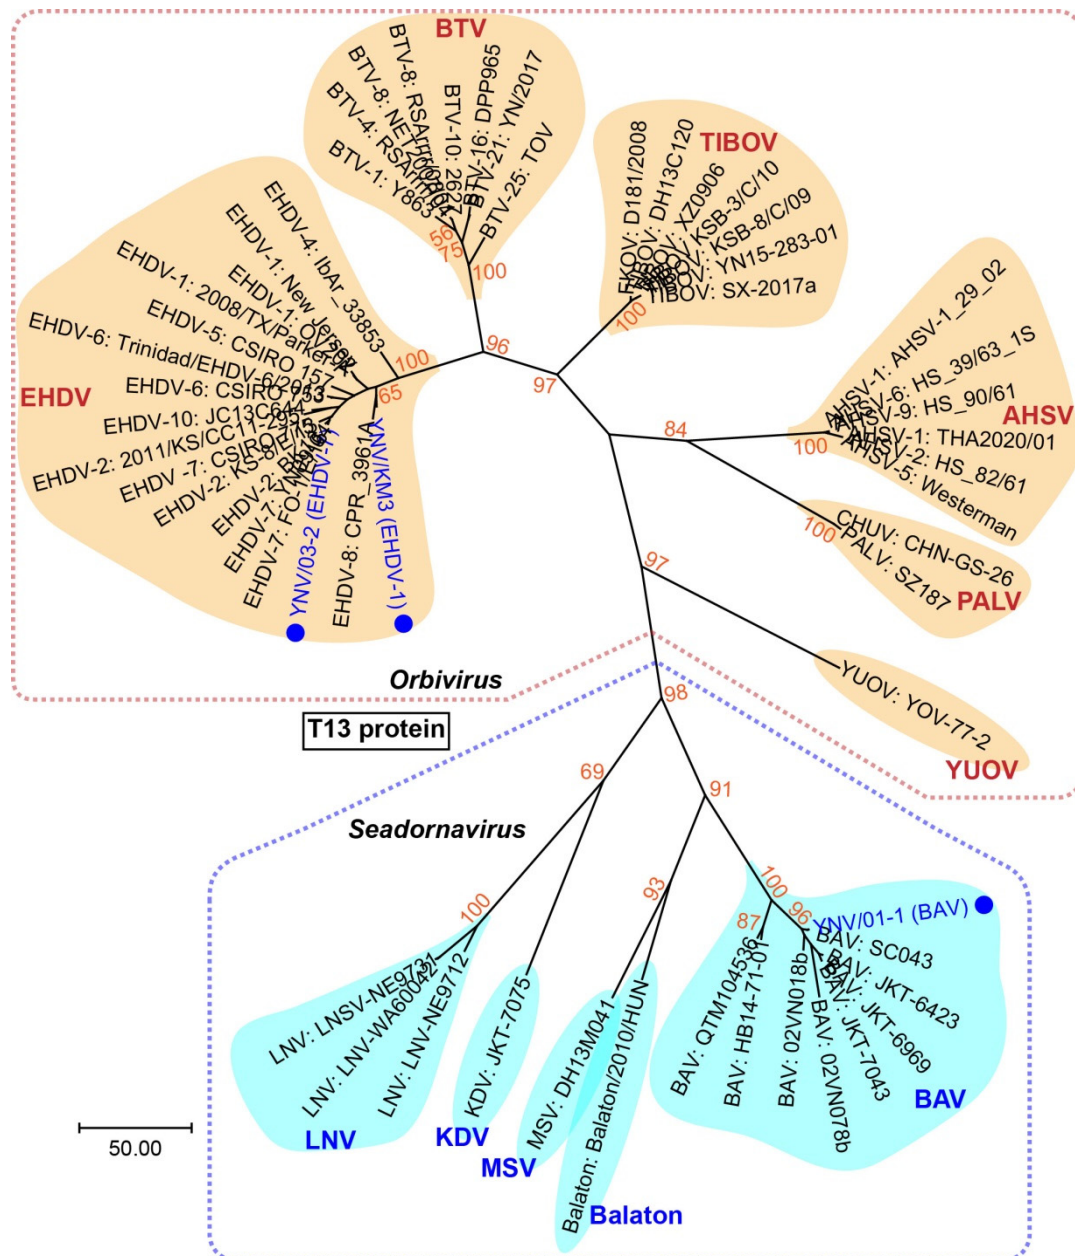

**Figure S1.** Phylogenetic tree of representative *Orbivirus* and *Seadornavirus* based on T13 core capsid protein genes. This tree is constructed using MP algorithm. Viral species and voucher names are provided; novel isolates reported in this study are highlighted in blue circles. Bootstrap values for major nodes and no less than 50% are shown.

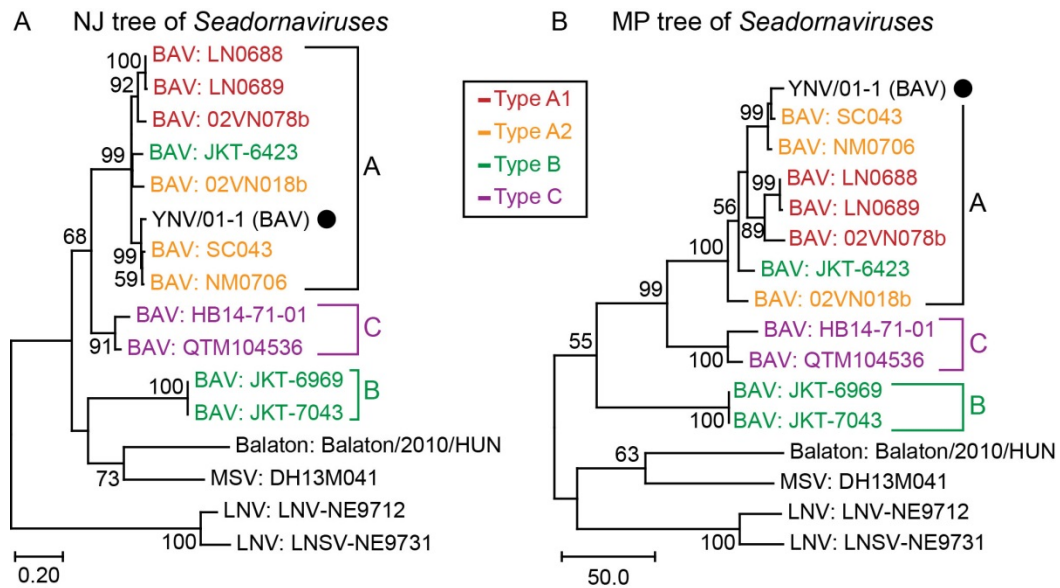

**Figure S2.** Phylogenetic trees of representative species and genotypes of *Seadornavirus*. Complete CDS of BAV VP9, Balaton virus VP10, MSV VP9, and LNV VP10 are used. Phylogenetic trees are constructed by NJ algorithm (A) and MP algorithm (B) respectively. Previously reported genotypes of BAV are highlighted by red (A1), orange (A2), green (B), and violet (C), respectively.

**Table S1.** Primers and probes used for RT-qPCR tests

| Target virus (gene) | Primer/probe <sup>a)</sup> | Sequence (5' to 3')            | Length (bp)<br><sup>b)</sup> |
|---------------------|----------------------------|--------------------------------|------------------------------|
| AKAV (NP)           | AKAV-S-F                   | AGTATACTGCAAATCCGGTGTCA        | 102                          |
|                     | AKAV-S-R                   | TTGATCTGATTAGCCTTGCACTG        |                              |
|                     | AKAV-S-probe               | CACTGCCTTTACGCTCCAYCGCATCTC    |                              |
| BAV (VP12)          | BAV-S12/YG-F               | TTCGCTAGGAGTCAAGGCT            | 115                          |
|                     | BAV-S12/YG-R               | TGCACTGATGCTGGAAATCAAGAA       |                              |
|                     | BAV-S12-probe              | ACTGTGGGTTGTGAGGGTCCAAGTCA     |                              |
| BTV (NS3)           | BTV-NS3-F                  | TGGAYAAAGCGATGTCAA A           | 97                           |
|                     | BTV-NS3-R                  | ACATCATCACGAAACGCTTC           |                              |
|                     | BTV-NS3-probe              | ARGCTGCATTTCGCATCGTACGC        |                              |
| EHDV (NS1)          | EHDV-NS1-F                 | TCTTCGTCGACTGCCATCGAG          | 83                           |
|                     | EHDV-NS1-R                 | AACATTTTGACATGATTGCRRTARTAACT  |                              |
|                     | EHDV-NS1-probe             | TGGAGCGCTTTTGTAGAAAATACAACATGA |                              |
| PALV (VP7)          | PALV-VP7-F                 | CATCAATGGCAACAATCGGTG          | 95                           |
|                     | PALV-VP7-R                 | ATTGAGCATACCTGTAATTCGTAC       |                              |
|                     | PALV-VP7-probe             | TTCCATATACAACGTCGGCAATGACAAG   |                              |
| TIBOV (VP6)         | TIBOV-S9-F                 | CTACGGAACGAGGAGGGGAT           | 100                          |
|                     | TIBOV-S9-R                 | CTCGCTGCACATTTCCATCTC          |                              |
|                     | TIBOV-S9-Probe             | ATCAGCTCGTCTCCTCCCTCTCGT       |                              |

a) All the probes are covalently conjugated by fluorescent group FAM (5') and quenching group BHQ1 (3'). b) Predicted length of segment produced by PCR amplification.

**Table S2.** Data of sequences downloaded from GenBank and used in this study.

| Viruses               | Strains             | Countries/<br>regions | Functional genes (segments) and their GenBank access numbers |                            |                   |                   |               |                            |
|-----------------------|---------------------|-----------------------|--------------------------------------------------------------|----------------------------|-------------------|-------------------|---------------|----------------------------|
|                       |                     |                       | VPI/RdRP                                                     | T2 protein                 | T13 protein       | Out ligand        | Out capsid    | RNA binding                |
| <b>Orbivirus:</b>     |                     |                       |                                                              |                            |                   |                   |               |                            |
| AHSV-1                | AHSV-1_29_02        | South Africa          | S1: KP939370.                                                | S3: KP939380.              | S7: KP939400.     |                   | S6: KP939395  | S8: KP939405.              |
| AHSV-1                | THA2020/01          | Thailand              | S1: MT586213                                                 | S3: MT586214.              | S7: MT586218      |                   | S6: MT586217  | S8: MT586219.              |
| AHSV-2                | HS_82/61            | South Africa          | S1: KF859996.                                                | S3: KF859998.              | S7: KF860002.     |                   | S6: KF860001  | S8: KF860004.              |
| AHSV-5                | Westerman           | South Africa          | S1: KP009781.                                                | S3: KP009783.              | S7: KP009787.     |                   | S6: KP009786  | S8: KP009788.              |
| AHSV-6                | HS_39/63_1S         | South Africa          | S1: KF860006.                                                | S3: KF860008.              | S7: KF860012.     |                   | S6: KF860011  | S8: KF860013.              |
| AHSV-9                | HS_90/61            | South Africa          | S1: KF860036.                                                | S3: KF860038.              | S7: KF860042.     |                   | S6: KF860041  | S8: KF860043.              |
| BTV-1                 | Y863                | China                 | S1: KC879615.                                                | S3: KC879617.              | S7: KC879621      |                   | S6: KC879620  | S8: KC879622.              |
| BTV-4                 | RSArtrr/04          | Cyprus                | S1: KP820946.                                                | S3: KP821188.              | S7: KP821670.     |                   | S6: KP821548  | S8: KP821790.              |
| BTV-8                 | NET2007/01          | Netherlands           | S1: GQ506451                                                 | S3: GQ506453.              | S7: GQ506457      |                   | S6: GQ506456  | S8: GQ506458.              |
| BTV-8                 | RSArtrr/08          | South Africa          | S1: KP820956.                                                | S3: KP821198.              | S7: KP821680.     |                   | S6: KP821558  | S8: KP821800.              |
| BTV-10                | 2627                | South Africa          | S1: JX272519.                                                | S3: JX272521.              | S7: JX272525.     |                   | S6: JX272524. | S8: JX272526.              |
| BTV-16                | DPP965              | Australia             | S1: JQ086231.                                                | S3: JQ086233.              | S7: JQ086237.     |                   | S6: JQ086236. | S8: JQ086238.              |
| BTV-21                | YN2017              | China                 | S1: MK250956                                                 | S3: MK250958.              | S7: MK250962      |                   | S6: MK250961  | S8: MK250963               |
| BTV-25                | TOV                 | Switzerland           | S1: GQ982522                                                 | S3: GQ982523.              | S7: EU839843.     |                   | S6: EU839842  | S8: EU839844.              |
| EHDV-1 <sup>a</sup> ) | JSA2008/TX/Parker-  | USA                   | S1: KU140721                                                 | S3: KU140769.              | S7: KU140889      | S2: KU140745      | S6: KU140841  | S8: KU140865.              |
| EHDV-1                | New Jersey          | USA                   | S1: AM744977                                                 | S3: AM744979.              | S7: AM744983      | S2: AM744978      | S6: AM744982  | S8: AM744984.              |
| EHDV-1                | OV202               | USA                   | S1: MF688826                                                 | S3: MF688828.              | S7: MF688832      | S2: MF688827      | S6: MF688830  | S8: MF688834.              |
| EHDV-2                | BK13                | Japan                 | S1: KM509050                                                 | S3: KM509052.              | S7: KM509056      | S2: KM509051      | S6: KM509055  | S8: KM509057               |
| EHDV-2 <sup>a</sup> ) | JSA2011/KS/CC11-2   | USA                   | S1: KU140706                                                 | S3: KU140754.              | S7: KU140874      | S2: KU140728      | S6: KU140824  | S8: KU140850.              |
| EHDV-2                | KS-8/E/13           | Japan                 | NA                                                           | S3: LC202974.              | S7: LC599914.     | S2: LC202952      | S6: LC202963  | S8: LC599915.              |
| EHDV-4                | IbAr_33853          | Nigeria               | S1: AM745017                                                 | S3: AM745019.              | S7: AM745023      | S2: AM745018      | S6: AM745022  | S8: AM745024.              |
| EHDV-5                | CSIRO_157           | Australia             | S1: AM745027                                                 | S3: AM745029.              | S7: AM745033      | S2: AM745028      | S6: AM745032  | S8: AM745034.              |
| EHDV-6                | CSIRO_753           | Australia             | S1: AM745037                                                 | S3: AM745039.              | S7: AM745043      | S2: AM745038      | S6: AM745042  | S8: AM745044.              |
| EHDV-6                | Trinidad/EHDV-6/201 | Trinidad and Tobago   | S1: MK919254                                                 | S3: MK919256.              | S7: MK919260      | S2: MK919255      | S6: MK919259  | S8: MK919261               |
| EHDV-7                | CSIRO_775           | Australia             | S1: AM745047                                                 | S3: AM745049.              | S7: AM745053      | S2: AM745048      | S6: AM745052  | S8: AM745054.              |
| EHDV-7                | FO-1/E/16           | Japan                 | S1: LC599904.                                                | S3: LC552732.              | S7: LC599907.     | S2: LC552731      | S6: LC552733  | S8: LC599908.              |
| EHDV-7                | YN09-04             | China                 | S1: MK656453                                                 | S3: MK656455.              | S7: MK656459      | S2: MK656454      | S6: MK656458  | S8: MK656460               |
| EHDV-8                | CPR_3961A           | Australia             | S1: AM745057                                                 | S3: AM745059.              | S7: AM745063      | S2: AM745058      | S6: AM745062  | S8: AM745064.              |
| EHDV-10               | JC13C644            | China                 | S1: MT013324                                                 | S3: MT013326.              | S7: MT013330      | S2: MT013325      | S6: MT013329  | S8: MT013331.              |
| PALV                  | (NA)                | Japan                 | S1: AB018086.                                                | NA                         | NA                | NA                | NA            | S8: AB018090.              |
| PALV                  | CHN-GS-26           | China                 | S1: MH090057                                                 | S3: MH090060.              | S7: MH090069      |                   | S6: MF642330  | S8: MH090072               |
| PALV                  | SZ187               | China                 | S1: KT002588.                                                | S3: KT002590.              | S7: KT002594.     |                   | S6: KT002593  | S8: KT002595.              |
| TIBOV                 | D181/2008           | China                 | S1: KR822286.                                                | S3: KR822288.              | S7: KR822292      |                   | S6: KR822291  | S8: KR822293.              |
| TIBOV                 | DH13C120            | China                 | S1: KU754026                                                 | S3: KU754028.              | S7: KU754032      |                   | S6: KU754031  | S8: unusual <sup>b</sup> ) |
| TIBOV                 | KSB-3/C/10          | Japan                 | S1: LC567102.                                                | S3: LC567104.              | S7: LC567108.     |                   | S6: LC567107  | S8: LC567109.              |
| TIBOV                 | KSB-8/C/09          | Japan                 | S1: LC567112.                                                | S3: LC567114.              | S7: LC567118.     |                   | S6: LC567117  | S8: LC567119.              |
| TIBOV                 | SX-2017a            | China                 | S1: NC_033782                                                | S3: NC_033784              | S7: NC_033788     |                   | S6: NC_033787 | S8: NC_033789              |
| TIBOV                 | YN15-283-01         | China                 | S1: MT793636                                                 | S3: MT793638.              | S7: MT793642      |                   | S6: MT793641  | S8: MT793643.              |
| TIBOV                 | XZ0906              | China                 | S1: KF746187.                                                | S3: KF746189.              | S7: KF746193.     |                   | S6: KF746192  | S8: KF746194.              |
| YUOV                  | YOV-77-2            | China                 | S1: AY701509.                                                | S2: AY701510.              | S8: AY701516.     |                   | S6: AY701514  | S7: AY701515.              |
| <b>Seadornavir</b>    |                     |                       |                                                              |                            |                   |                   |               |                            |
|                       | s:                  |                       |                                                              |                            |                   |                   |               |                            |
| Balaton               | Balaton/2010/HUN    | Hungary               | S1: JX947843.                                                | S2: KF790697.              | S9: KC522612      | S10: JX947848     | S4: JX947845. | S11: JX947849.             |
| BAV                   | 02VN018b            | Vietnam               | S1: EU265683.                                                | S2: EU265684.              | S8: EU265690.     | S9: EU265691      | S4: EU265686  | S12: EU265694              |
| BAV                   | 02VN078b            | Vietnam               | S1: EU265695.                                                | S2: EU265696.              | S8: EU265702.     | S9: EU312980      | S4: EU265698  | S12: EU265705              |
| BAV                   | BAV-CH              | China                 | S1: AF168005.                                                | S2: AF134526.              | NA <sup>c</sup> ) | NA <sup>c</sup> ) | S4: AY549308  | NA <sup>c</sup> )          |
| BAV                   | GS07KD12            | China                 | NA                                                           | NA                         | NA                | NA                | NA            | S12: GQ331954              |
| BAV                   | GS07KD16            | China                 | NA                                                           | NA                         | NA                | NA                | NA            | S12: GQ331956              |
| BAV                   | HB14-71-01          | China                 | S1: MH521264                                                 | S2: MH521265.              | S8: MH521271      | S9: MH521272      | S4: MH521267  | S12: MH521275              |
| BAV                   | JKT-6423            | Indonesia             | S1: unusual <sup>d</sup> )                                   | S2: NC_004217              | S8: AF052017.     | S9: AF052016      | S4: NC_004215 | S12: AF019908              |
| BAV                   | JKT-6969            | Indonesia             | S1: unusual <sup>e</sup> )                                   | S2: unusual <sup>e</sup> ) | S8: AF052012.     | S9: AF052011      | NA            | S12: AF052008              |
| BAV                   | JKT-7043            | Indonesia             | S1: unusual <sup>e</sup> )                                   | S2: unusual <sup>e</sup> ) | S8: AF052028.     | S9: AF052027      | NA            | S12: AF052024              |
| BAV                   | LN0688              | China                 | NA                                                           | NA                         | NA                | S9: KU744434      | NA            | S12: FJ217990.             |
| BAV                   | LN0689              | China                 | NA                                                           | NA                         | NA                | S9: KU744435      | NA            | S12: FJ217991.             |
| BAV                   | NM0706              | China                 | NA                                                           | NA                         | NA                | S9: KU744415      | NA            | S12: GQ331973              |
| BAV                   | QTM104536           | China                 | S1: KX884638.                                                | S2: KX884639.              | S8: KX884645      | S9: KX884646      | S4: KX884641  | S12: KX884648              |
| BAV                   | SC043               | China                 | S1: KC954611.                                                | S2: KC954612.              | S8: KC954618      | S9: KC954619      | S4: KC954614  | S12: KC954622              |
| BAV                   | YN0659              | China                 | NA                                                           | NA                         | NA                | NA                | NA            | S12: FJ161965.             |
| KDV                   | JKT-7075            | Indonesia             | S1: NC_004210                                                | S2: NC_004212              | S9: NC_004207     |                   | S4: NC_004214 | S8: NC_004208              |
| LNV                   | LNV-NE9712          | China                 | NA                                                           | NA                         | S8: AY701346.     |                   | S4: AY701342  | S11: AY701349              |
| LNV                   | LNSV-NE9731         | China                 | S1: AY317099.                                                | S2: AY317100.              | S8: AY317106.     |                   | S4: AY317102  | S11: AY317109              |
| LNV                   | LNV-WA60042         | Australia             | S1: MG725860                                                 | partial <sup>f</sup> )     | S8: MG725867      |                   | S4: MG725863  | S11: MG725870              |
| MSV                   | DH13M041            | China                 | S1: KR349187.                                                | S2: KR349188.              | S7: KR349193      | S9: KR349195      | S4: KR349190  | S11: KR349197              |

a) Full strain names of these viruses are EHD1/USA2008/TX/Parker-A and EHD2/USA2011/KS/CC11-29 respectively. b) This sequence (S8: KU754033.1) of TIBOV strain DH13C120 contains an extra stop codon in CDS, so it was not used. c) Some sequences (S8: AF052034.1; S9: AF052033.1; S12: AF052030.1) were used as the genes of BAV strain BAV-CH in some references, but these records did not show any strain information in GenBank. d) This sequence (S1: NC\_004211.1) of BAV strain JKT-6423 contains many extra stop codons in CDS, so it was not used. e) These sequences from BAV strains JKT-6969 and JKT-7043 were incomplete and strange, so they were not used. f) This sequence (S2: MG725861.1) from LNV strain LNV-WA60042 was incomplete, so it was not used.

**Table S3.** The general genome data of BAV strain YNV/01-1.

| Segments | Encoded proteins and their functions  | Segments and genes |         |            |                            | Proteins        |          | GenBank accession numbers |
|----------|---------------------------------------|--------------------|---------|------------|----------------------------|-----------------|----------|---------------------------|
|          |                                       | Length (bp)        | G+C (%) | CDS ranges | Terminal sequences (5'-3') | Amino acid (aa) | Wt (kDa) |                           |
| Seg1     | VP1: core capsid, RdRP                | 3,762              | 38.44   | 24: 3683   | <u>GUAUUA</u> ---ACUGAC    | 1,219           | 138      | OM953801                  |
| Seg2     | VP2: core capsid (T2)                 | 3,050              | 40.39   | 93: 2960   | <u>GUAUAA</u> ---CUCGAC    | 955             | 108      | OM953802                  |
| Seg3     | VP3: core capsid, guanylyltransferase | 2,399              | 38.02   | 24: 2186   | <u>GUAUUA</u> ---ACUGAC    | 720             | 82       | OM953803                  |
| Seg4     | VP4: outer capsid                     | 2,032              | 39.62   | 27: 1913   | <u>GUAUUU</u> ---UUUGAC    | 628             | 70       | OM953804                  |
| Seg5     | VP5: NS protein                       | 1,686              | 39.15   | 32: 1528   | <u>GUAUUA</u> ---ACUGAC    | 498             | 55       | OM953805                  |
| Seg6     | VP6: NS protein, NTPase               | 1,671              | 41.35   | 112: 1389  | <u>GUAUUU</u> ---ACUGAC    | 425             | 48       | OM953806                  |
| Seg7     | VP7: NS protein, protein kinase       | 1,137              | 36.41   | 65: 985    | <u>GUAUUA</u> ---ACUGAC    | 306             | 35       | OM953807                  |
| Seg8     | VP8: core capsid (T13)                | 1,119              | 43.25   | 33: 941    | <u>GUAUUU</u> ---ACCGAC    | 302             | 33       | OM953808                  |
| Seg9     | VP9: outer capsid, cell attachment    | 1,100              | 38.91   | 24: 875    | <u>GUAUUU</u> ---ACCGAC    | 283             | 30       | OM953809                  |
| Seg10    | VP10: core protein                    | 977                | 37.26   | 29: 778    | <u>GUAUUU</u> ---ACUGAC    | 249             | 29       | OM953810                  |
| Seg11    | VP11: NS protein                      | 867                | 39.10   | 77: 619    | <u>GUAUUA</u> ---ACUGAC    | 180             | 21       | OM953811                  |
| Seg12    | VP12: NS protein, binding dsRNA       | 861                | 37.51   | 44: 667    | <u>GUAUUA</u> ---ACAGAC    | 207             | 24       | OM953812                  |
| Total    |                                       | 20,661             | 39.19   |            | <u>GUAU</u> -----GAC       |                 |          |                           |

**Table S4.** The general genome data of EHDV-1 strain YNV/KM3.

| Segment s | Encoded proteins and their functions       | Segments and genes |         |            |                                        | Proteins         |          | GenBank accession numbers |
|-----------|--------------------------------------------|--------------------|---------|------------|----------------------------------------|------------------|----------|---------------------------|
|           |                                            | Length (bp)        | G+C (%) | CDS ranges | Terminal sequences (5'-3')             | Amino acids (aa) | Wt (kDa) |                           |
| Seg1      | VP1: core capsid, RdRP                     | 3,942              | 40.03   | 12: 3920   | <u>GUUAAAAT</u> ---<br><u>ACACUUAC</u> | 1,302            | 150      | OM953791                  |
| Seg2      | VP2: outer capsid, ruminant cell ligand    | 2,968              | 40.16   | 17: 2932   | <u>GUUAAA</u> UU---<br><u>ACACUUAC</u> | 971              | 113      | OM953792                  |
| Seg3      | VP3: core capsid protein (T2)              | 2,768              | 41.69   | 18: 2717   | <u>GUUAAA</u> UU---<br><u>ACACUUAC</u> | 899              | 103      | OM953793                  |
| Seg4      | VP4: core capsid protein                   | 1,984              | 41.23   | 9: 1943    | <u>GUUAAA</u> AC---<br><u>CACCUUAC</u> | 644              | 76       | OM953794                  |
| Seg5      | NS1: NS protein, forming tubulin           | 1,769              | 43.58   | 32: 1687   | <u>GUUAAAAA</u> ---<br><u>ACACUUAC</u> | 551              | 65       | OM953795                  |
| Seg6      | VP5: outer capsid                          | 1,640              | 42.87   | 25: 1611   | <u>GUUAAAAA</u> ---<br><u>ACACUUAC</u> | 528              | 59       | OM953796                  |
| Seg7      | VP7: core capsid (T13), insect cell ligand | 1,162              | 43.80   | 18: 1067   | <u>GUUAAAAT</u> ---<br><u>CAACUUAC</u> | 349              | 38       | OM953797                  |
| Seg8      | NS2: NS protein, binding dsRNA             | 1,192              | 44.71   | 20: 1147   | <u>GUUAAAAA</u> ---<br><u>ACACUUAC</u> | 375              | 44       | OM953798                  |
| Seg9      | VP6: capsid, helicase                      | 1,071              | 45.28   | 15: 1025   | <u>GUUAAAAA</u> ---<br><u>AAACUUAC</u> | 336              | 37       | OM953799                  |
| Seg10     | NS3: NS protein, virus release             | 810                | 43.95   | 21: 707    | <u>GUUAAAAA</u> ---<br><u>ACACUUAC</u> | 228              | 25       | OM953800                  |
| Total     |                                            | 19,306             | 41.95   |            | <u>GUUAAA</u> -----<br><u>CUUAC</u>    |                  |          |                           |

**Table S5.** The general genome data of EHDV-7 strain YNV/03-2.

| Segments | Encoded proteins and their functions       | Segments and genes |         |            |                                        | Proteins        |          | GenBank accession numbers |
|----------|--------------------------------------------|--------------------|---------|------------|----------------------------------------|-----------------|----------|---------------------------|
|          |                                            | Length (bp)        | G+C (%) | CDS ranges | Terminal sequences (5'-3')             | Amino acid (aa) | Wt (kDa) |                           |
| Seg1     | VP1: core capsid, RdRP                     | 3,942              | 39.73   | 12: 3920   | <u>GUUAAAAU</u> ---<br><u>ACACUUAC</u> | 1,302           | 150      | OM953813                  |
| Seg2     | VP2: outer capsid, ruminant cell ligand    | 3,002              | 40.37   | 18: 2966   | <u>GUUAAAAU</u> ---<br><u>AGUCUUAC</u> | 982             | 115      | OM953814                  |
| Seg3     | VP3: core capsid protein (T2)              | 2,768              | 42.16   | 18: 2717   | <u>GUUAAAAU</u> ---<br><u>ACACUUAC</u> | 899             | 103      | OM953815                  |
| Seg4     | VP4: core capsid protein                   | 1,984              | 41.28   | 9: 1943    | <u>GUUAAAAA</u> ---<br><u>CACCUUAC</u> | 644             | 76       | OM953816                  |
| Seg5     | NS1: NS protein, forming tubulin           | 1,769              | 42.91   | 32: 1687   | <u>GUUAAAAA</u> ---<br><u>ACACUUAC</u> | 551             | 65       | OM953817                  |
| Seg6     | VP5: outer capsid                          | 1,641              | 43.69   | 28: 1611   | <u>GUUAAAAA</u> ---<br><u>CCACUUAC</u> | 527             | 59       | OM953818                  |
| Seg7     | VP7: core capsid (T13), insect cell ligand | 1,162              | 42.86   | 18: 1067   | <u>GUUAAAAU</u> ---<br><u>CAACUUAC</u> | 349             | 38       | OM953819                  |
| Seg8     | NS2: NS protein, binding dsRNA             | 1,192              | 44.97   | 20: 1147   | <u>GUUAAAAA</u> ---<br><u>ACACUUAC</u> | 375             | 44       | OM953820                  |
| Seg9     | VP6: core capsid, helicase                 | 1,074              | 46.28   | 15: 1028   | <u>GUUAAAAA</u> ---<br><u>AAACUUAC</u> | 337             | 38       | OM953821                  |
| Seg10    | NS3: NS protein, virus release             | 810                | 45.06   | 21: 707    | <u>GUUAAAAA</u> ---<br><u>ACACUUAC</u> | 228             | 25       | OM953822                  |
| Total    |                                            | 19,344             | 42.06   |            | <u>GUUAAA</u> -----<br><u>CUUAC</u>    |                 |          |                           |

**Table S6.** VP1 genetic distances between species of *Orbivirus*.

|       | BTV   | EHDV  | PALV  | TIBOV | YUOV  |
|-------|-------|-------|-------|-------|-------|
| AHSV  | 0.417 | 0.417 | 0.397 | 0.466 | 0.653 |
| BTV   |       | 0.192 | 0.456 | 0.249 | 0.634 |
| EHDV  |       |       | 0.456 | 0.249 | 0.634 |
| PALV  |       |       |       | 0.505 | 0.692 |
| TIBOV |       |       |       |       | 0.683 |

Note: These genetic distances were calculated based on phylogenetic tree of VP1 (Figure 2).

**Table S7.** VP1 genetic distances between species of *Seadornavirus*.

|         | BAV   | KDV   | LNV   | MSV   |
|---------|-------|-------|-------|-------|
| Balaton | 0.366 | 0.896 | 0.706 | 0.301 |
| BAV     |       | 0.696 | 0.506 | 0.349 |
| KDV     |       |       | 0.694 | 0.879 |
| LNV     |       |       |       | 0.689 |

Note: These genetic distances were calculated based on phylogenetic tree of VP1 (Figure 2).

**Table S8.** T2 protein genetic distances between species of *Orbivirus*.

|       | BTV   | EHDV  | PALV  | TIBOV | YUOV  |
|-------|-------|-------|-------|-------|-------|
| AHSV  | 0.423 | 0.432 | 0.393 | 0.475 | 0.894 |
| BTV   |       | 0.149 | 0.432 | 0.192 | 0.801 |
| EHDV  |       |       | 0.441 | 0.191 | 0.810 |
| PALV  |       |       |       | 0.484 | 0.903 |
| TIBOV |       |       |       |       | 0.853 |

Note: These genetic distances were calculated based on phylogenetic tree of T2 proteins (Figure 3).

**Table S9.** T2 protein genetic distances between species of *Seadornavirus*.

|         | BAV   | KDV   | LNV   | MSV   |
|---------|-------|-------|-------|-------|
| Balaton | 0.576 | 1.273 | 1.369 | 0.441 |
| BAV     |       | 1.029 | 1.125 | 0.567 |
| KDV     |       |       | 0.962 | 1.264 |
| LNV     |       |       |       | 1.360 |

Note: These genetic distances were calculated based on phylogenetic tree of T2 proteins (Figure 3).
